# Supplementary material for: Alcohol consumption induces murine osteoporosis by downregulation of natural killer T‐like cell activity
Source: PubMed Central journal article supplement (PMC8589379; doi:10.1002/iid3.485), 2021-07-02
Supplement: IID3-9-1370-s001.pdf [file IID3-9-1370-s001.pdf]

# Supporting Information for

Alcohol consumption induces murine osteoporosis by downregulating natural killer T-like cell activity

Munehiro Naruo, Yasuyuki Negishi, Takahisa Okuda, Midori Katsuyama, Ken Okazaki, and Rimpei Morita

Corresponding authors

Yasuyuki Negishi, M.D., Ph.D.

Email: [negi@nms.ac.jp](mailto:negi@nms.ac.jp)

Rimpei Morita, M.D., Ph.D.

Email: [rimpei-morita@nms.ac.jp](mailto:rimpei-morita@nms.ac.jp)

## **This PDF file includes:**

Supporting Information Figures S1 to S9

Supporting Information Tables S1 to S2

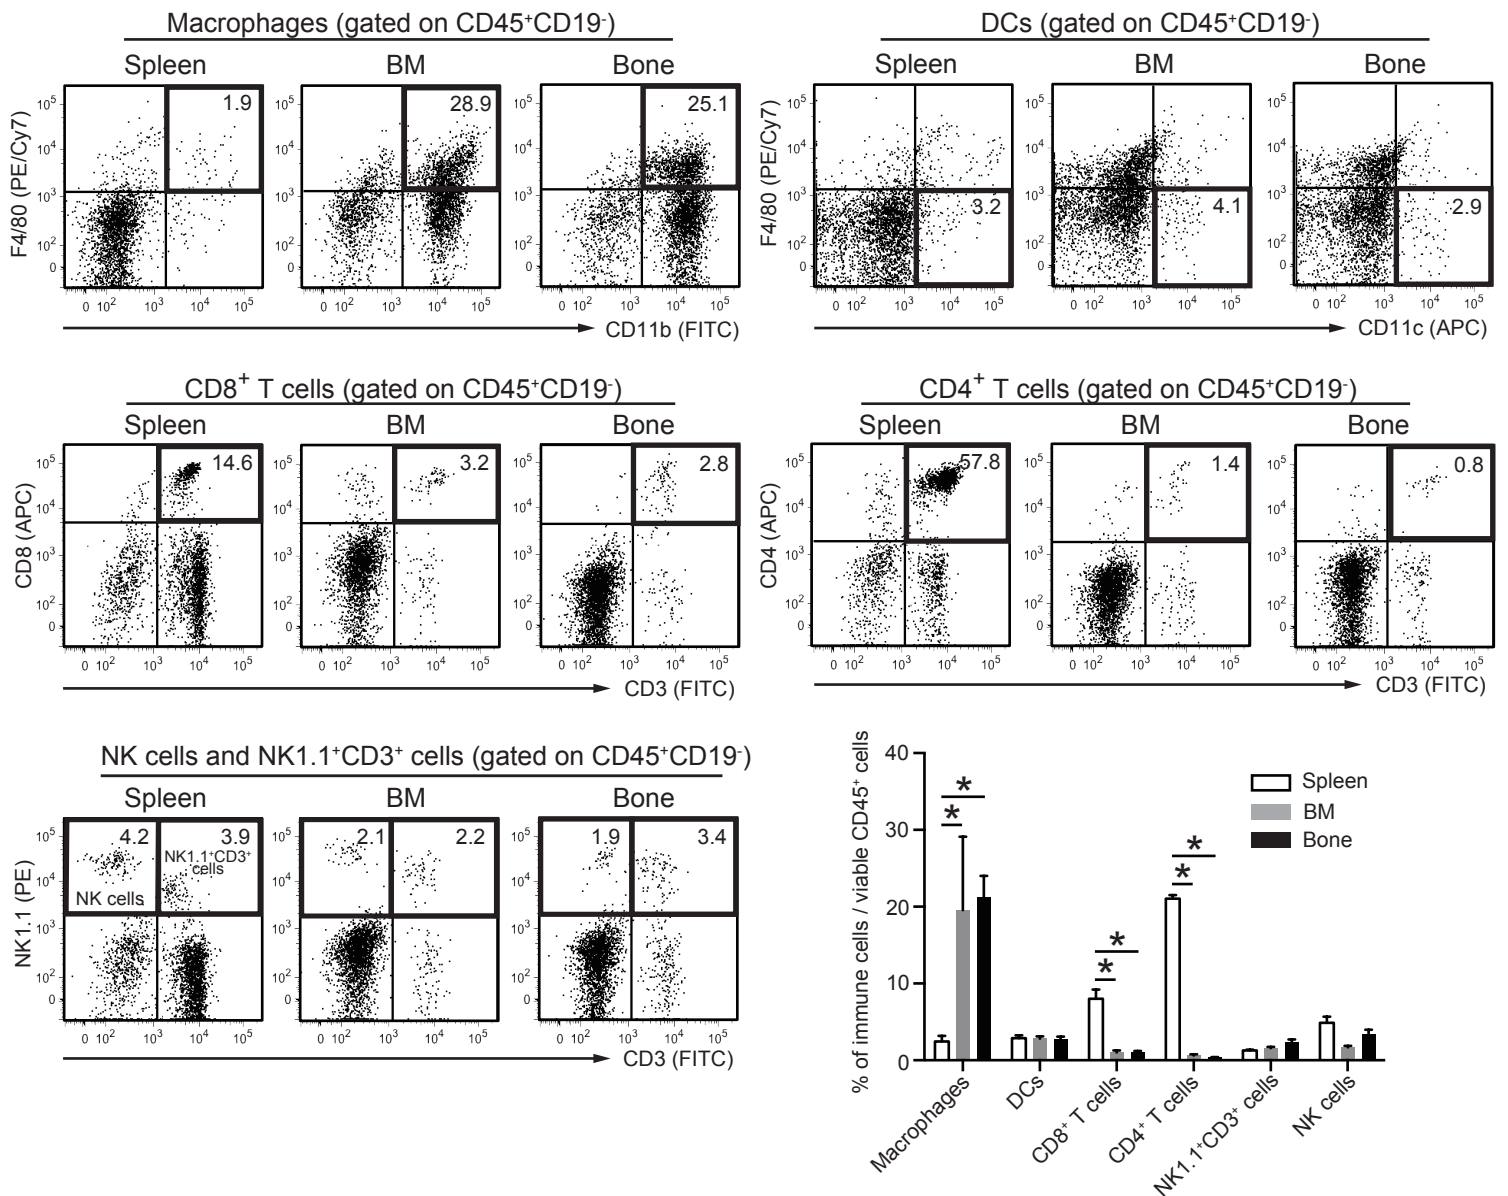

**Supporting Information Figure S1. Identification and distribution of immune cells in the spleen, BM, and bone.** Representative flow cytometric analysis of macrophages, DCs, CD8<sup>+</sup> T cells, CD4<sup>+</sup> T cells, NK cells, and NK1.1<sup>+</sup>CD3<sup>+</sup> cells and the percentages of these cells among viable CD45<sup>+</sup> cells in the spleen, BM, and bone. The full gating strategies are presented in Supporting Information 2 (bone), 3 (BM), and 4 (spleen). Data represent the mean  $\pm$  S.D. (7 mice/group), and were pooled from six independent experiments. \* $P < 0.05$ ; one-way ANOVA followed by Bonferroni post-tests.

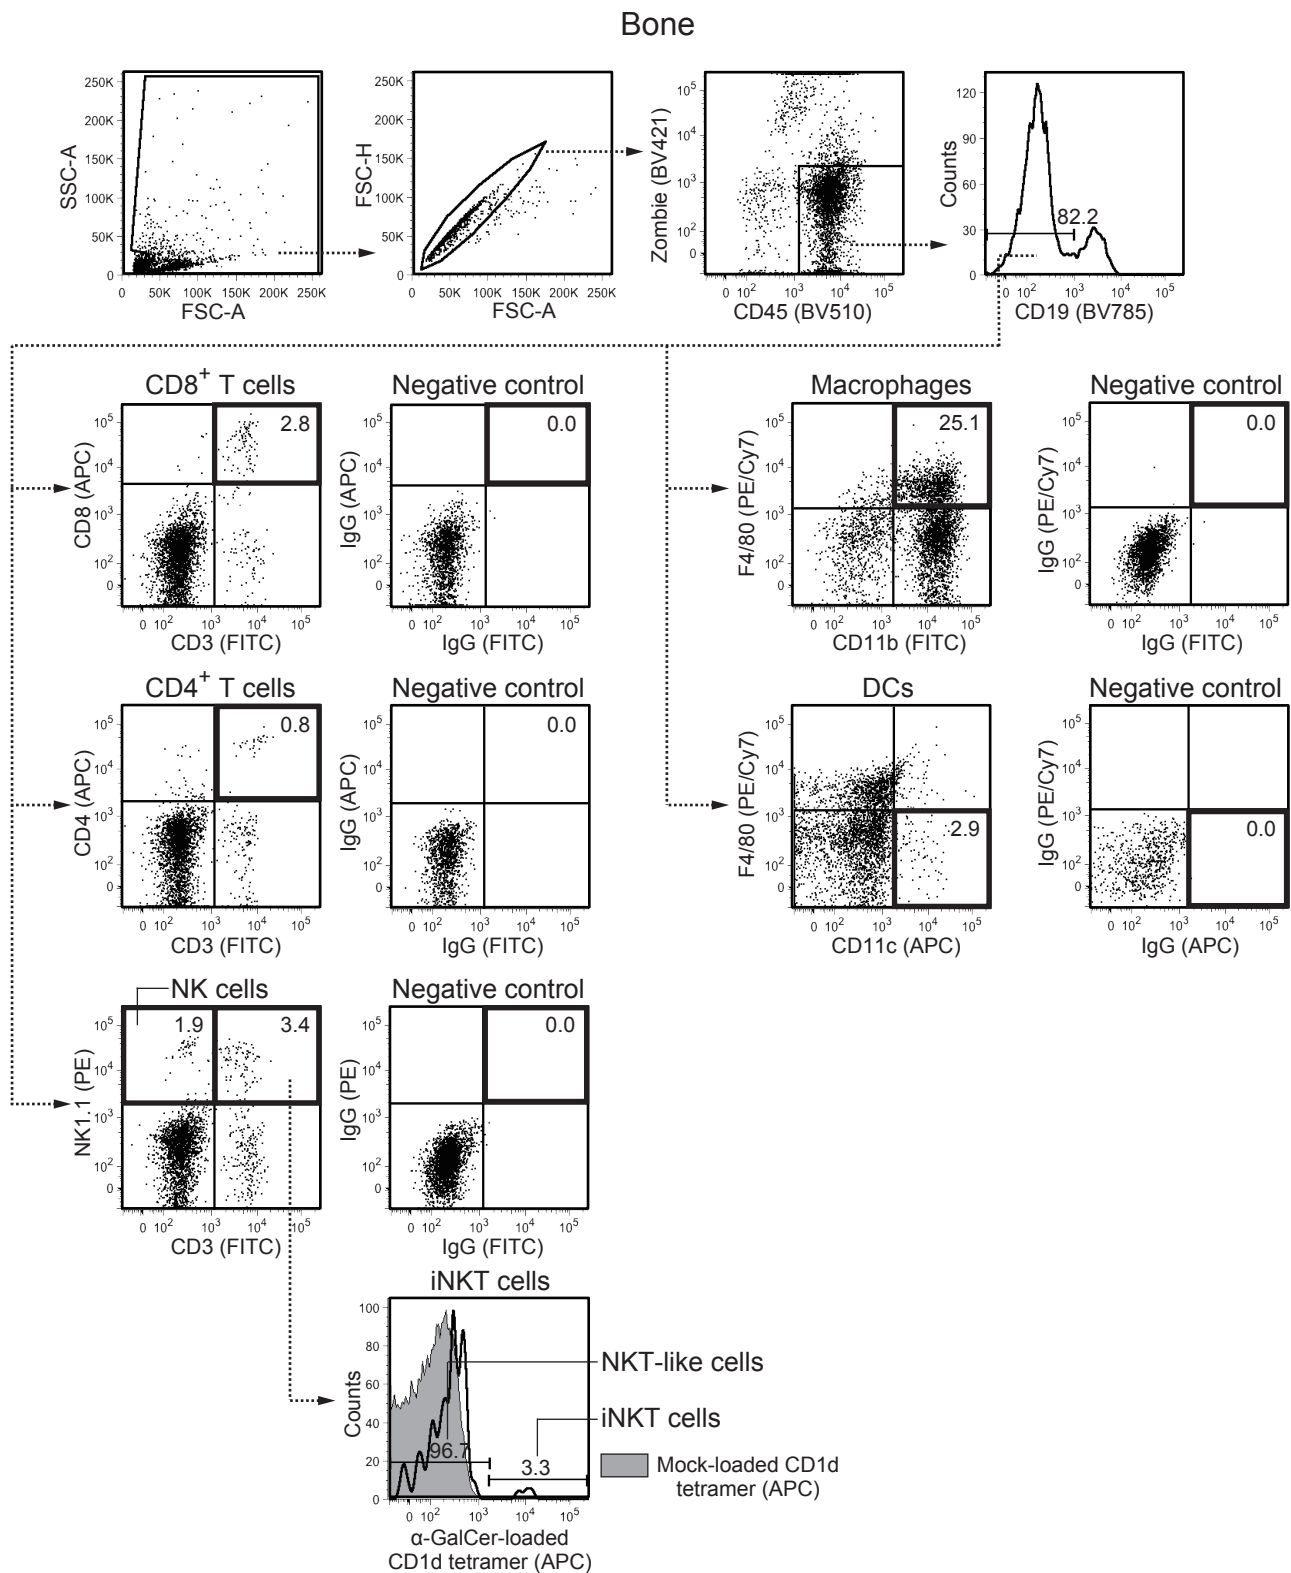

**Supporting Information Figure S2. Representative gating strategies of flow cytometric analysis for the detection of macrophages, DCs, CD8<sup>+</sup> T cells, CD4<sup>+</sup> T cells, NK cells, iNKT cells, and NKT-like cells in bone.** Macrophages were identified as Zombie<sup>-</sup>, CD45<sup>+</sup>, CD19<sup>-</sup>, F4/80<sup>+</sup>, and CD11b<sup>+</sup>. DCs were identified as Zombie<sup>-</sup>, CD45<sup>+</sup>, CD19<sup>-</sup>, F4/80<sup>-</sup>, and CD11c<sup>+</sup>. CD8<sup>+</sup> T cells were identified as Zombie<sup>-</sup>, CD45<sup>+</sup>, CD19<sup>-</sup>, CD3<sup>+</sup>, and CD8<sup>+</sup>. CD4<sup>+</sup> T cells were identified as Zombie<sup>-</sup>, CD45<sup>+</sup>, CD19<sup>-</sup>, CD3<sup>+</sup>, and CD4<sup>+</sup>. NK cells were identified as Zombie<sup>-</sup>, CD45<sup>+</sup>, CD19<sup>-</sup>, CD3<sup>-</sup>, and NK1.1<sup>+</sup>. iNKT cells were identified as Zombie<sup>-</sup>, CD45<sup>+</sup>, CD19<sup>-</sup>, CD3<sup>+</sup>, NK1.1<sup>+</sup>, and  $\alpha$ -GalCer-loaded CD1d tetramer<sup>+</sup>. NKT-like cells were identified as Zombie<sup>-</sup>, CD45<sup>+</sup>, CD19<sup>-</sup>, CD3<sup>+</sup>, NK1.1<sup>+</sup>, and  $\alpha$ -GalCer-loaded CD1d tetramer<sup>-</sup>.

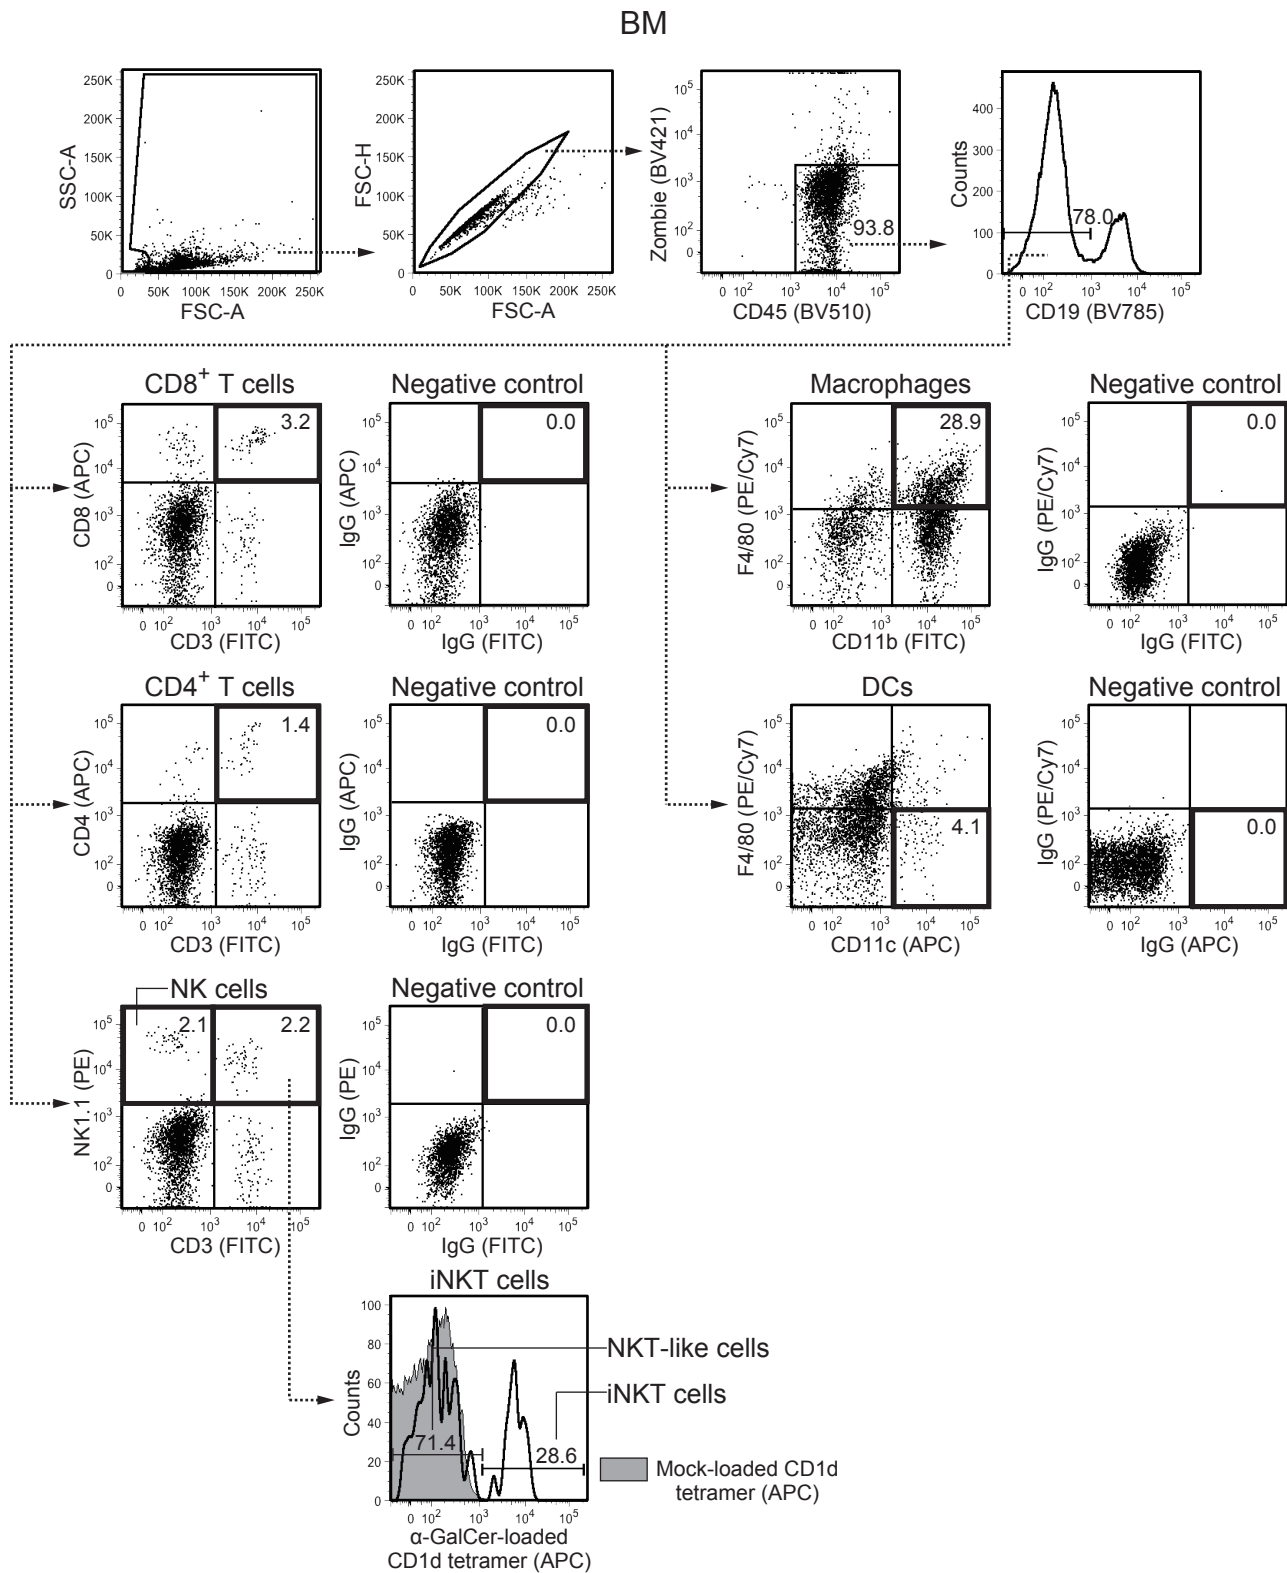

**Supporting Information Figure S3. Representative gating strategies of flow cytometric analysis for the detection of macrophages, DCs, CD8<sup>+</sup> T cells, CD4<sup>+</sup> T cells, NK cells, iNKT cells, and NKT-like cells in BM.** Macrophages were identified as Zombie<sup>-</sup>, CD45<sup>+</sup>, CD19<sup>-</sup>, F4/80<sup>+</sup>, and CD11b<sup>+</sup>. DCs were identified as Zombie<sup>-</sup>, CD45<sup>+</sup>, CD19<sup>-</sup>, F4/80<sup>-</sup>, and CD11c<sup>+</sup>. CD8<sup>+</sup> T cells were identified as Zombie<sup>-</sup>, CD45<sup>+</sup>, CD19<sup>-</sup>, CD3<sup>+</sup>, and CD8<sup>+</sup>. CD4<sup>+</sup> T cells were identified as Zombie<sup>-</sup>, CD45<sup>+</sup>, CD19<sup>-</sup>, CD3<sup>+</sup>, and CD4<sup>+</sup>. NK cells were identified as Zombie<sup>-</sup>, CD45<sup>+</sup>, CD19<sup>-</sup>, CD3<sup>-</sup>, and NK1.1<sup>+</sup>. iNKT cells were identified as Zombie<sup>-</sup>, CD45<sup>+</sup>, CD19<sup>-</sup>, CD3<sup>+</sup>, NK1.1<sup>+</sup>, and  $\alpha$ -GalCer-loaded CD1d tetramer<sup>+</sup>. NKT-like cells were identified as Zombie<sup>-</sup>, CD45<sup>+</sup>, CD19<sup>-</sup>, CD3<sup>+</sup>, NK1.1<sup>+</sup>, and  $\alpha$ -GalCer-loaded CD1d tetramer<sup>-</sup>.

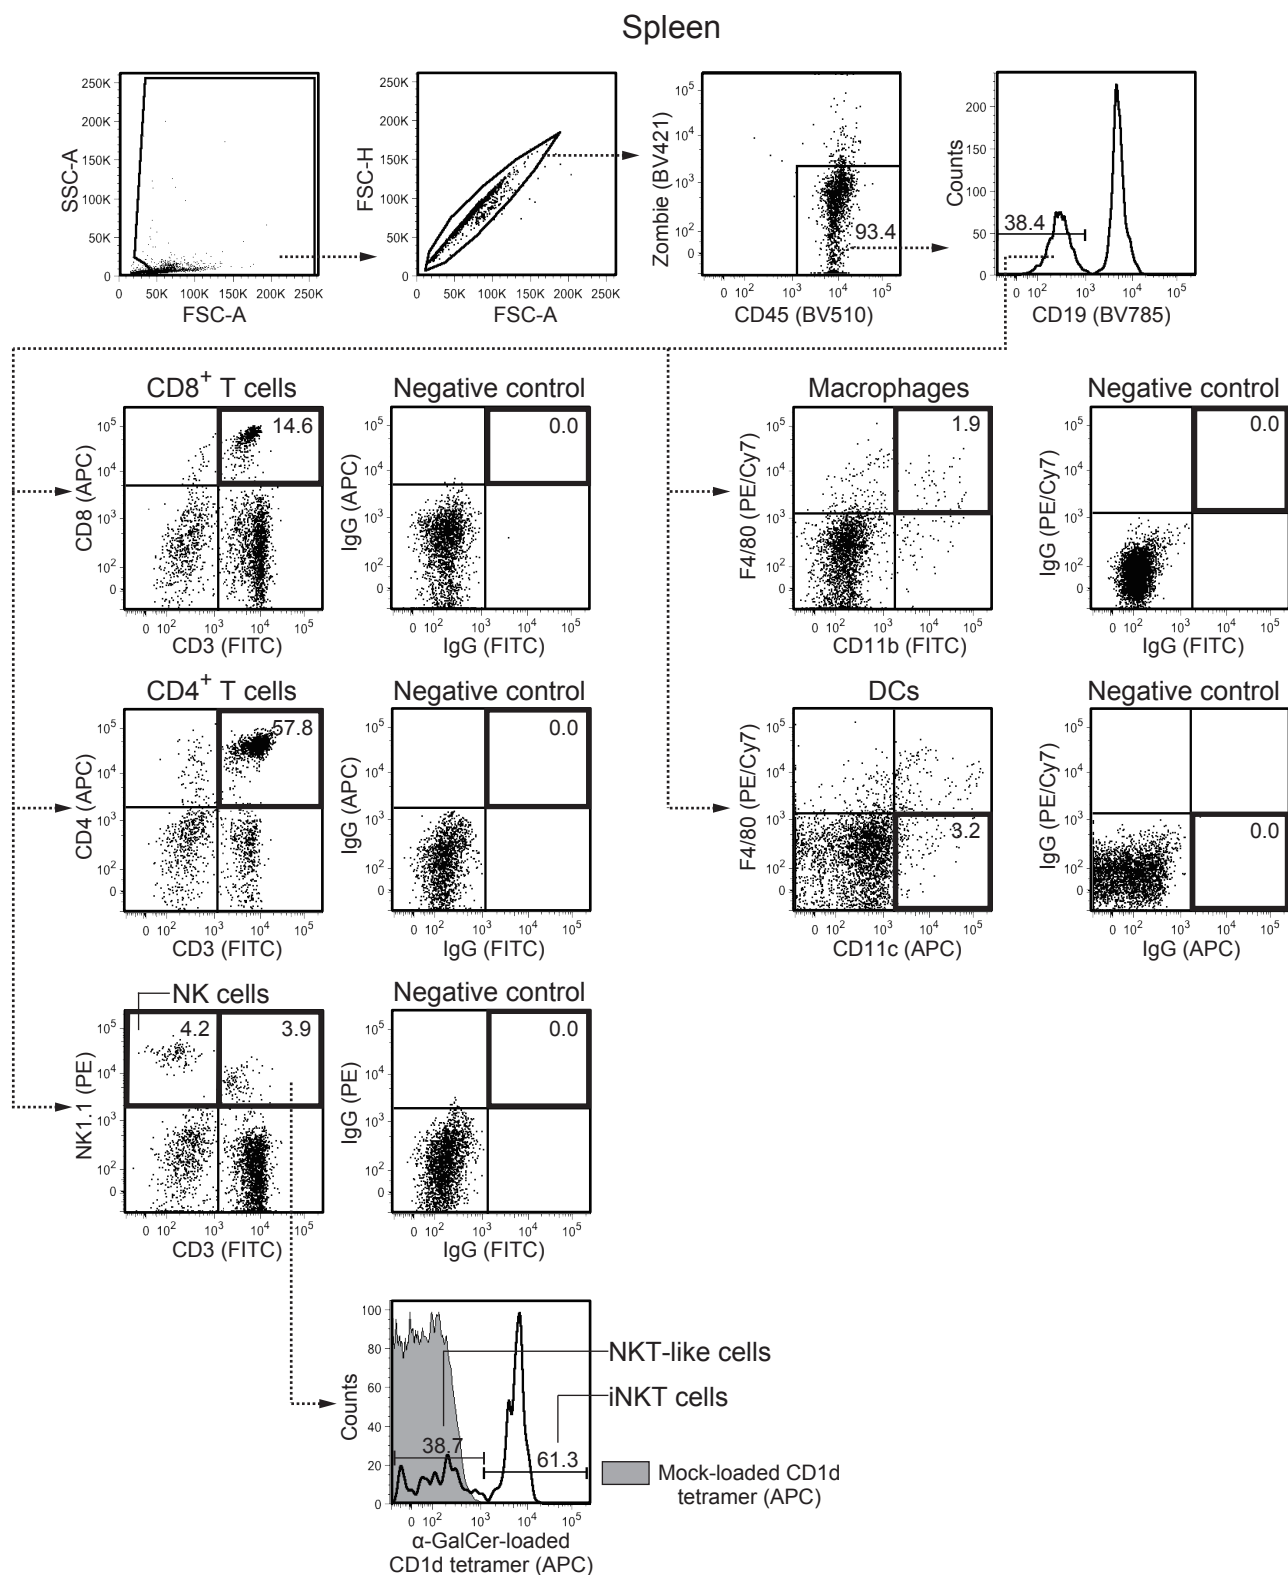

**Supporting Information Figure S4. Representative gating strategies of flow cytometric analysis for the detection of macrophages, DCs, CD8<sup>+</sup> T cells, CD4<sup>+</sup> T cells, NK cells, iNKT cells, and NKT-like cells in spleen.** Macrophages were identified as Zombie<sup>-</sup>, CD45<sup>+</sup>, CD19<sup>-</sup>, F4/80<sup>+</sup>, and CD11b<sup>+</sup>. DCs were identified as Zombie<sup>-</sup>, CD45<sup>+</sup>, CD19<sup>-</sup>, F4/80<sup>-</sup>, and CD11c<sup>+</sup>. CD8<sup>+</sup> T cells were identified as Zombie<sup>-</sup>, CD45<sup>+</sup>, CD19<sup>-</sup>, CD3<sup>+</sup>, and CD8<sup>+</sup>. CD4<sup>+</sup> T cells were identified as Zombie<sup>-</sup>, CD45<sup>+</sup>, CD19<sup>-</sup>, CD3<sup>+</sup>, and CD4<sup>+</sup>. NK cells were identified as Zombie<sup>-</sup>, CD45<sup>+</sup>, CD19<sup>-</sup>, CD3<sup>-</sup>, and NK1.1<sup>+</sup>. iNKT cells were identified as Zombie<sup>-</sup>, CD45<sup>+</sup>, CD19<sup>-</sup>, CD3<sup>+</sup>, NK1.1<sup>+</sup>, and α-GalCer-loaded CD1d tetramer<sup>+</sup>. NKT-like cells were identified as Zombie<sup>-</sup>, CD45<sup>+</sup>, CD19<sup>-</sup>, CD3<sup>+</sup>, NK1.1<sup>+</sup>, and α-GalCer-loaded CD1d tetramer<sup>-</sup>.

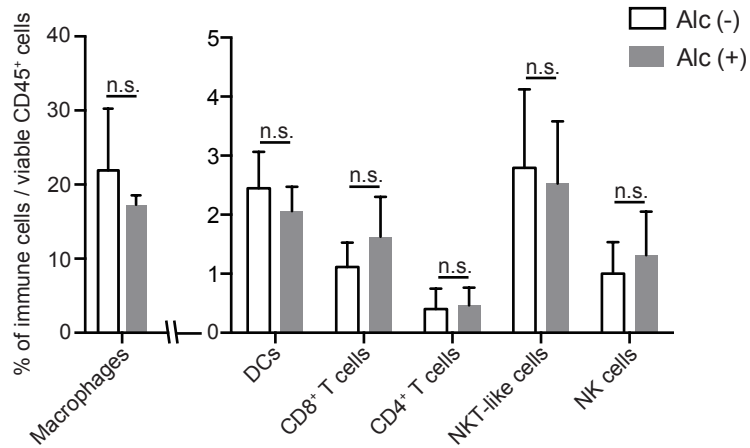

**Supporting Information Figure S5. Alcohol consumption does not alter the distribution of immune cells in bone.** The percentage of macrophages, DCs, CD8<sup>+</sup> T cells, CD4<sup>+</sup> T cells, NK cells, and NKT-like cells among viable CD45<sup>+</sup> cells in bone obtained from alcohol- and water-treated B6 mice. NK1.1<sup>+</sup>CD3<sup>+</sup> cells were defined as NKT-like cells. The femurs and tibiae were separated, and cells in these bones were analyzed via flow cytometry. Data represent the mean ± SD (6–8 mice/group), and were pooled from six independent experiments. Mann–Whitney test. n.s.: not significant.

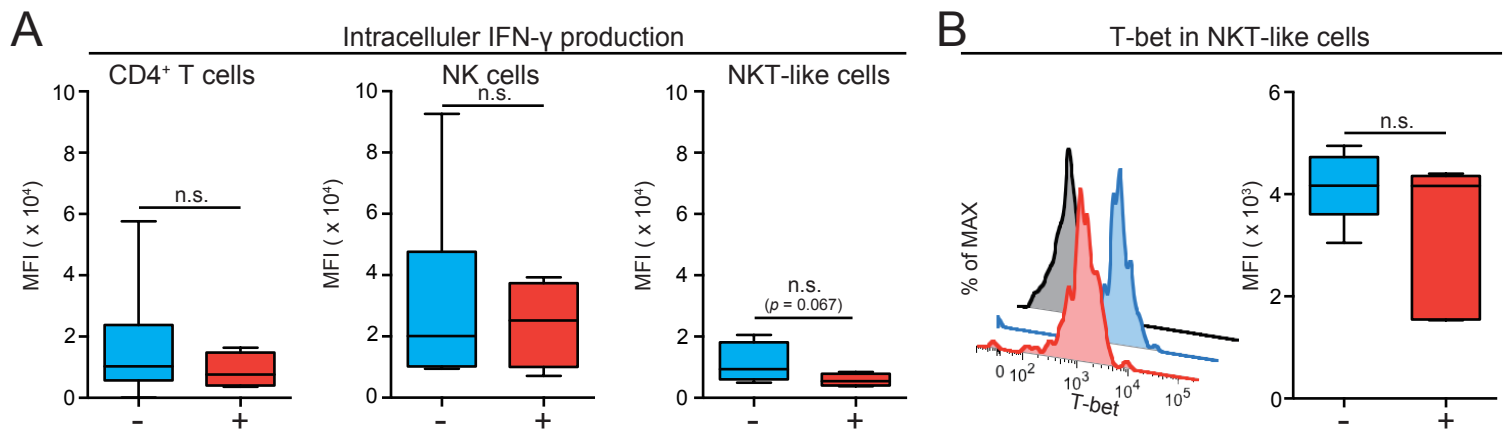

**Supporting Information Figure S6. Alcohol consumption does not alter the intracellular IFN- $\gamma$  production in immune cells.** (A) Intracellular IFN- $\gamma$  levels in CD4<sup>+</sup> T cells, NK cells, and NKT-like cells in bone analyzed via flow cytometry (5–6 mice/group). The data were pooled from five independent experiments. (B) Expression of T-bet in NKT-like cells analyzed by flow cytometry (5 mice/group). The data were pooled from five independent experiments. Grey: isotype control. Blue: water-treated B6 mice. Red: alcohol-treated B6 mice. Box plots: horizontal lines of boxes represent the medians, the boxes represent the interquartile ranges, and the whiskers extend to extreme values. Mann-Whitney test. n.s.: not significant.

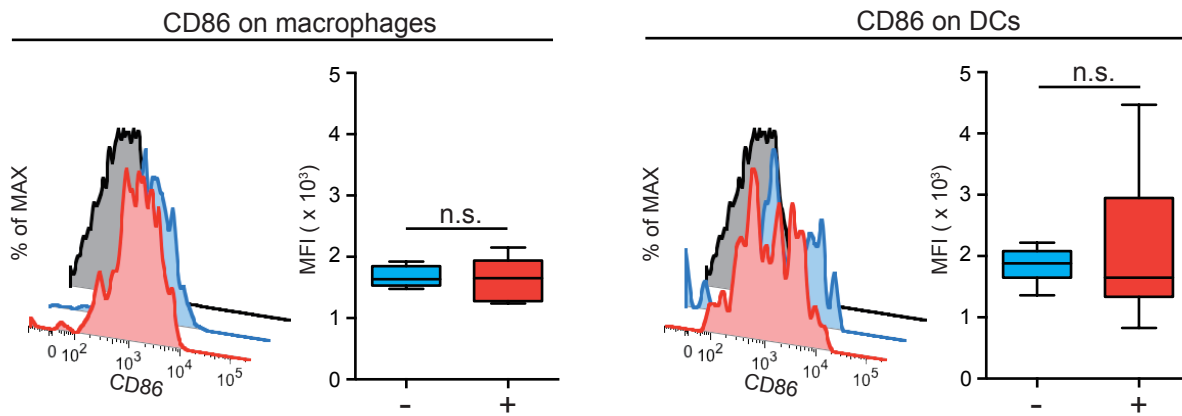

**Supporting Information Figure S7. Alcohol consumption does not alter the CD86 expression levels on APCs.** CD86 expression on macrophages and DCs was analyzed by flow cytometry. Grey: isotype control. Blue: water-treated B6 mice. Red: alcohol-treated B6 mice. Box plots: horizontal lines of boxes represent the medians, the boxes represent the interquartile ranges, and the whiskers extend to extreme values (5 mice/group). The data were pooled from five independent experiments. Mann–Whitney test. n.s.: not significant.



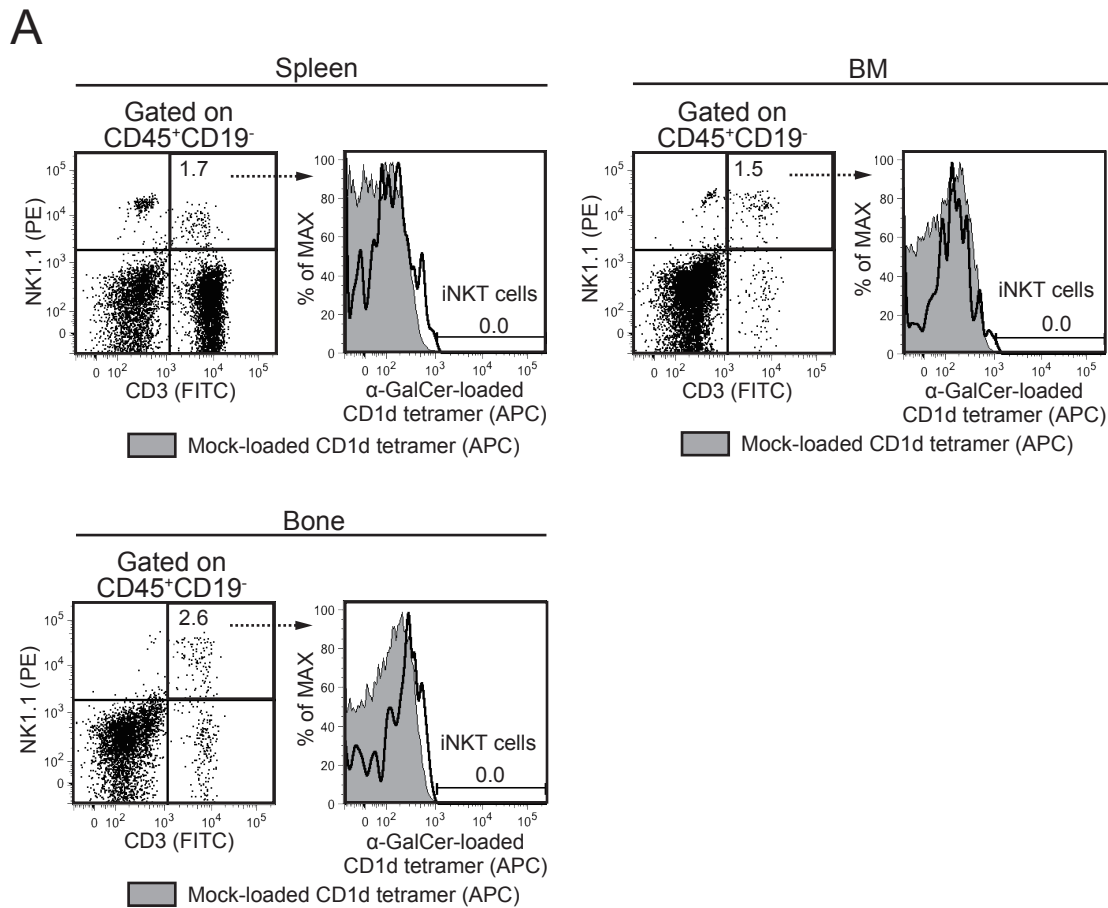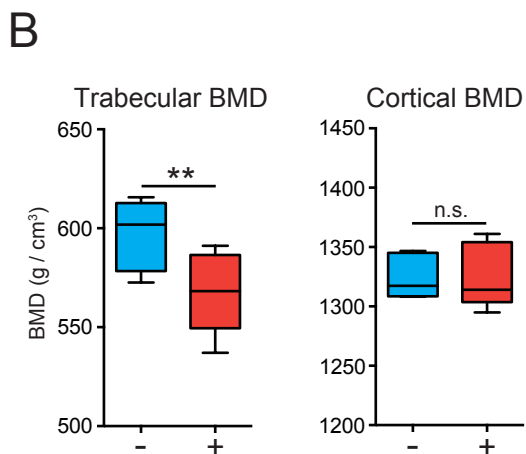

**Supporting Information Figure S8. Alcohol-induced osteoporosis is promoted in iNKT cell-deficient ( $Cd1d^{-/-}$ ) mice, which possess NKT-like cells.** (A) Representative flow cytometry of  $NK1.1^+CD3^+$  cells and CD1d tetramer-positive cells among  $NK1.1^+CD3^+$  cells in the spleen, BM, and bone obtained from  $Cd1d^{-/-}$  mice. (B) Trabecular and cortical BMD in alcohol-treated (red) and water-treated (blue)  $Cd1d^{-/-}$  mice. Box plots: horizontal lines of boxes represent the medians, the boxes represent the interquartile ranges, and the whiskers extend to extreme values (6 mice/group). The data were pooled from four independent experiments. \* $P < 0.05$ ; Mann–Whitney test. n.s.: not significant.

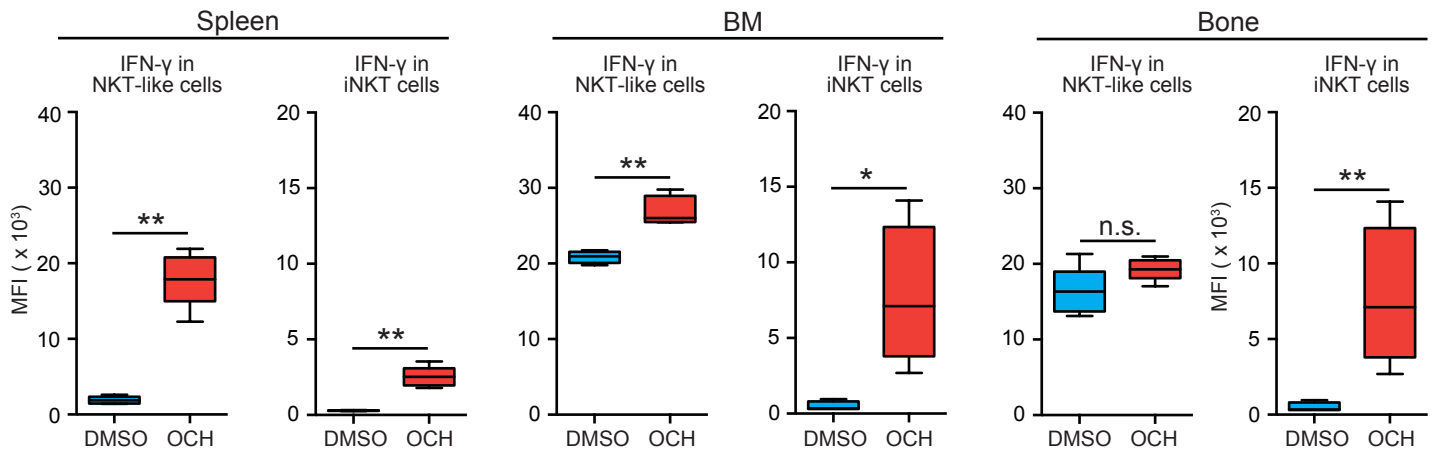

**Supporting Information Table S1.** Primer used for RT-qPCR

| Gene          | Forward primer           | Reverse primer          | Accession no.  |
|---------------|--------------------------|-------------------------|----------------|
| <i>Nfatc1</i> | CCCGTCACATTCTGGTCCAT     | CAAGTAACCGTGTAGCTGCACAA | NM_01679.41    |
| <i>Rankl</i>  | TGAAGACACACTACCTGACTCCTG | CCCACAATGTGTTGCAGTTC    | NM_011613.3    |
| <i>Bglap</i>  | AAGCAGGAGGGCAATAAGGT     | GTTCTGGAGAGCAGCCAAAG    | NM_001305448.1 |
| <i>Actb</i>   | GCGCAAGTTAGGTTTTGTCAAAG  | TGGATCAGCAAGCAGGAGTAC   | NM_007393.5    |

*Nfatc1*; nuclear factor of activated T cells, cytoplasmic, calcineurin dependent 1, *Rankl*; receptor activator of nuclear factor kappa B ligand, *Bglap*; bone gamma-carboxyglutamate protein, *Actb*; Actin beta

**Supporting Information Table S2. Antibodies used in the study**

| Antibody                                  | Clone        | Source                          |
|-------------------------------------------|--------------|---------------------------------|
| CD3 $\epsilon$ -FITC                      | 145-2C11     | BioLegend (San Diego, CA)       |
| CD4-APC                                   | RM4-5        | BioLegend                       |
| CD8-APC                                   | 53-6.7       | BioLegend                       |
| CD11b-FITC                                | M1/70        | BioLegend                       |
| CD11c-APC                                 | N418         | BioLegend                       |
| CD19-BV785                                | 6D5          | BioLegend                       |
| CD45-BV510                                | 30-F11       | BioLegend                       |
| CD69-BUV395                               | H1.2F3       | BD OptiBuild (San Jose, CA)     |
| CD86-PE                                   | GL-1         | BioLegend                       |
| NK1.1-PE                                  | PK136        | BioLegend                       |
| F4/80-PE/Cy7                              | BM8          | BioLegend                       |
| CD1d-BUV395                               | 1B1          | BD OptiBuild                    |
| $\alpha$ -GalCer loaded CD1d-tetramer-APC | code:E001-4B | Proimmune (Oxford, UK)          |
| Mock loaded CD1d-tetramer-APC             | code:E002-4A | Proimmune                       |
| IL-4-PE/Cy7                               | 11B11        | BD Pharmingen (San Jose, CA)    |
| IFN- $\gamma$ -PE/Cy7                     | XMG1.2       | BD Pharmingen                   |
| IL-12/IL-23p40-PE/Cy7                     | C17.B        | Invitrogen (Carlsbad, CA)       |
| T-bet-PE                                  | REA102       | Miltenyi Biotec (San Diego, CA) |
| GATA3-PE                                  | REA174       | Miltenyi Biotec                 |
| REA control (I)-PE                        | REA293       | Miltenyi Biotec                 |
